# Supplementary material for: Gating the conductance of a single-molecule junction with ion-π interaction
Source: Royal Society of Chemistry journal article supplement (doi:10.1039/d2cc02755k), 2022-01-01
Supplement: d2cc02755k1.pdf [file d2cc02755k1.pdf]

# Gating the Conductance of Single - Molecule Junction with Ion- $\pi$ Interaction

Rui Wang,<sup>a</sup> Yingjie Li,<sup>a</sup> Ajun Tang,<sup>a</sup> Yunpeng Li,<sup>a</sup> Hongxiang Li<sup>a\*</sup>

<sup>a</sup>Key Laboratory for Advanced Materials, Feringa Nobel Prize Scientist Joint Research Center, Frontiers Science Center for Materiobiology and Dynamic Chemistry, Institute of Fine Chemicals, School of Chemistry and Molecular Engineering, East China University of Science and Technology, Shanghai, 200237, P. R. China.

Email: [lihongxiang@ecust.edu.cn](mailto:lihongxiang@ecust.edu.cn)

## Materials and instruments

Unless otherwise stated, all the chemicals were obtained from a commercial supplier (Adamas) and used without further purification. The NMR spectra were obtained using Bruker AVANCE III 600 MHz NMR instruments. The HRMS was carried out on a Waters Xevo G2-XS ToF mass spectrometer. Single molecule conductance measurements were carried out using Xtech STM-BJ instrument, and the data was analyzed using XMe open-source code.

VSM<sub>e</sub> and PA[5] were synthesized according to reported literatures.<sup>1,2</sup>

## Conductance measurement of single-molecule junctions

The single molecular conductance of compounds was measured under an applied bias of 100 mV in propylene carbonate (PC) solvent. The concentration of VSM<sub>e</sub> was 0.1 mM. As for VSM<sub>e</sub> -PA[5] complex, PA[5] was added excessively to the solution of VSM<sub>e</sub> to ensure the complete complexation of VSM<sub>e</sub>. The STM tip (0.25 mm diameter, 99.99%) was etched electrochemically at a constant bias of 5 V and coated with Apiezon wax to suppress the background conductance of the PC solvent. The Au substrates were prepared by slow evaporation of ~20/200 nm Cr/Au at 1 Å s<sup>-1</sup> onto a silicon wafer.

In STM-BJ measurement, the Au tip was controlled firstly by a stepper motor to obtain the approximate position to contact the substrate (less than 1 μm); thereafter the tip is

controlled by a piezo stack under the voltage of 0.1 V, with the approach/retract speed of 15 nm/s. During breaking and forming junctions process, the bias is kept at 100 mV, the real-time conductance is recorded using a custom-built I-V converter with a sampling rate of 20 kHz. During the test process, the contact between Au STM tip and Au substrate was repeatedly formed and broken. With the tip retraction, the Au-Au point contact formed initially. Upon the rupture of the contact, the target molecule bound to the electrodes and Au-molecule-Au junction formed. Figure 2a in manuscript shows the conductance-displacement of the target molecules, where the conductance quantum  $G_0$  ( $2e^2/h = 77.5 \mu\text{S}$ ) represents the formation of Au-Au point contact. After the breaking of Au-Au point contact, a plateau under  $G_0$  is observed, which indicates the formation of the molecular junction.

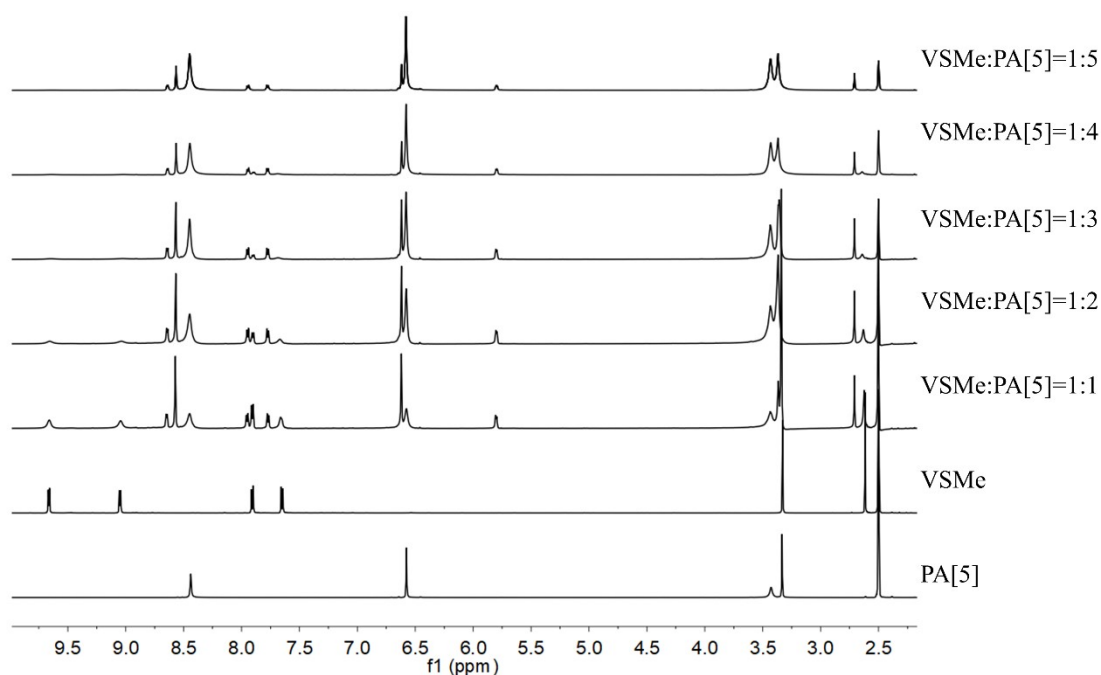

Fig. S1 <sup>1</sup>H NMR spectra (600 MHz, *d*<sub>6</sub>-DMSO, 298 K) of VSMc titrated with PA[5] from 0 to 5.0 equivalents.

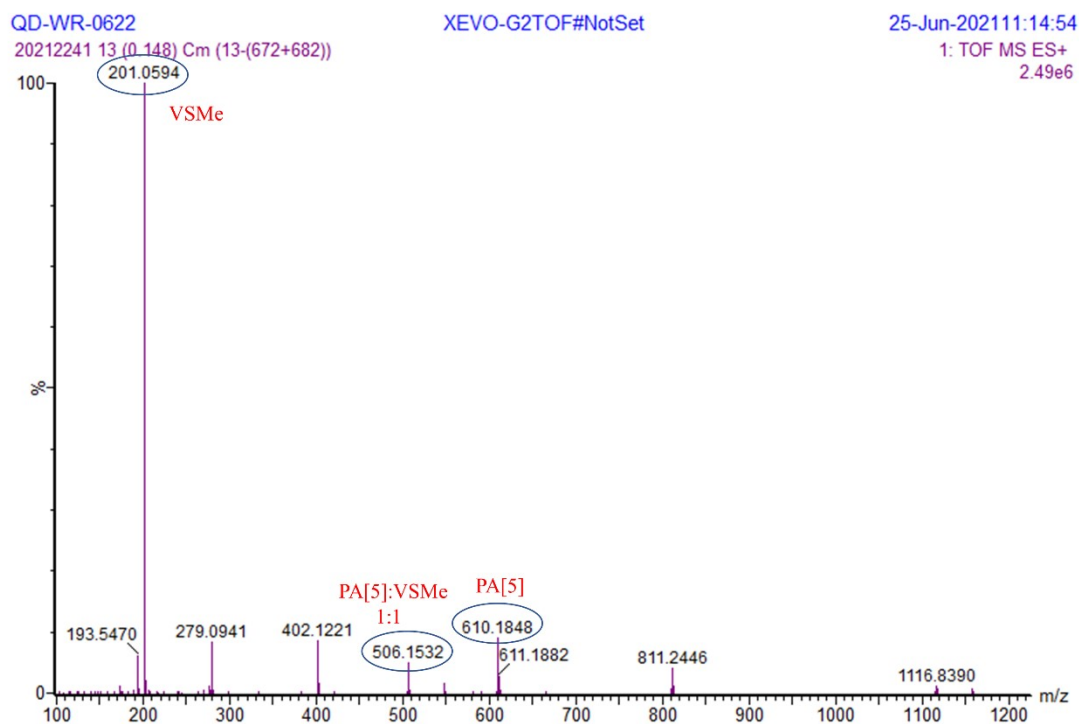

Fig. S2 Electrospray ionization mass spectrometry of a mixture with equimolar of VSMe and PA[5].

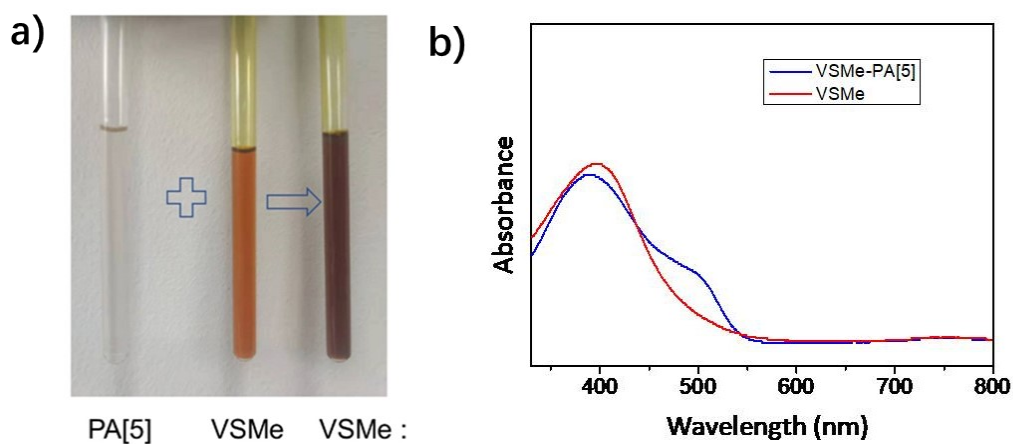

Fig. S3 a) The solution color of PA[5], VSMe and VSMe-PA[5] complex; b) The absorption spectra of VSMe and VSMe-PA[5] in DMSO solution. VSMe-PA[5] was prepared *in situ* by mixing the same equivalence of VSMe and PA[5].

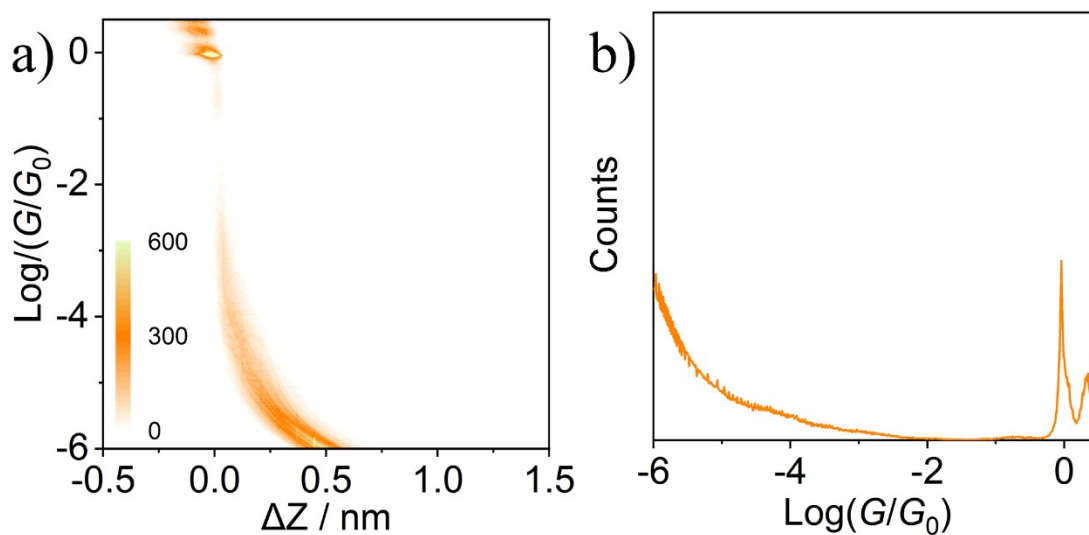

Fig. S4 (a) Two-dimensional (2D) conductance-displacement histogram and (b) One-dimensional (1D) conductance histograms for PA[5].

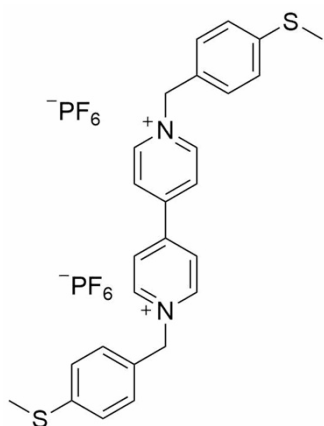

Fig. S5 The molecular structure of BIPY-SMeBn.

## References

- 1 W. Zhang, S. Gan, A. Vezzoli, R. J. Davidson, D. C. Milan, K. V. Luzyanin, S. J. Higgins, R. J. Nichols, A. Beeby, P. J. Low, B. Li and L. Niu, *ACS Nano*, 2016, **10**, 5212-5220.
- 2 X. Wang, K. Ji, A. Rockenbauer, Y. Liu and Y. Song, *Organic & Biomolecular Chemistry*, 2020, **18**, 2321-2325.
